# Supplementary material for: A Systematic Approach for Developing 3D High-Quality PDMS Microfluidic Chips Based on Micromilling Technology
Source: MDPI journal article supplement (doi:10.3390/mi13010006), 2021-12-22

## Supplementary Material

### **A systematic approach for developing 3D high-quality PDMS microfluidic chips based on micromilling technology**

*Amin Javidanbardan<sup>1,2</sup>, Ana M. Azevedo<sup>1,2\*</sup>, Virginia Chu<sup>3</sup>, João P. Conde<sup>2,3\*</sup>*

*<sup>1</sup>IBB – Institute for Bioengineering and Biosciences, Instituto Superior Técnico, Universidade de Lisboa, Lisbon, Portugal*

*<sup>2</sup>Department of Bioengineering, Instituto Superior Técnico, Universidade de Lisboa, Lisbon, Portugal*

*<sup>3</sup>Instituto de Engenharia de Sistemas e Computadores – Microsistemas e Nanotecnologias (INESC MN) and IN – Institute of Nanoscience and Nanotechnology*

*\*Corresponding authors.*

**Figure S1.** A photo of the micromilled PMMA master mold, with the negative features, with the possibility of parallel fabrication of five 3D PDMS microfluidic structures.

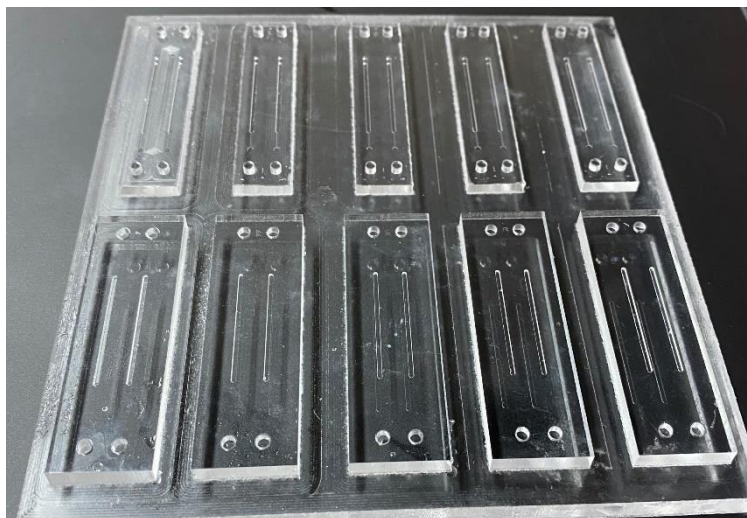

Supplement: s1 [file s1]
