# Supplementary material for: A Systematic Approach for Developing 3D High-Quality PDMS Microfluidic Chips Based on Micromilling Technology
Source: MDPI journal article supplement (doi:10.3390/mi13010006), 2021-12-22
Supplement: s1 [file s1]

## Supplementary Material

### **A systematic approach for developing 3D high-quality PDMS microfluidic chips based on micromilling technology**

*Amin Javidanbardan<sup>1,2</sup>, Ana M. Azevedo<sup>1,2\*</sup>, Virginia Chu<sup>3</sup>, João P. Conde<sup>2,3\*</sup>*

*<sup>1</sup>IBB – Institute for Bioengineering and Biosciences, Instituto Superior Técnico, Universidade de Lisboa, Lisbon, Portugal*

*<sup>2</sup>Department of Bioengineering, Instituto Superior Técnico, Universidade de Lisboa, Lisbon, Portugal*

*<sup>3</sup>Instituto de Engenharia de Sistemas e Computadores – Microsistemas e Nanotecnologias (INESC MN) and IN – Institute of Nanoscience and Nanotechnology*

*\*Corresponding authors.*

**Table S1. The created design and response data, surface roughness, in micromilling optimization**

| <b>Std</b> | <b>Run</b> | <b>A-Feed rate<br/>(mm/min)</b> | <b>B-Spindle speed<br/>(rpm)</b> | <b>C-Final depth increment<br/>(mm)</b> | <b>Surface roughness<br/>(nm)</b> |
|------------|------------|---------------------------------|----------------------------------|-----------------------------------------|-----------------------------------|
| 7          | 1          | 100                             | 12000                            | 0.15                                    | 507                               |
| 5          | 2          | 100                             | 6000                             | 0.15                                    | 605                               |
| 1          | 3          | 100                             | 6000                             | 0.05                                    | 622                               |
| 8          | 4          | 300                             | 12000                            | 0.15                                    | 1150                              |
| 10         | 5          | 300                             | 9000                             | 0.1                                     | 1620                              |
| 16         | 6          | 200                             | 9000                             | 0.1                                     | 1085                              |
| 20         | 7          | 200                             | 9000                             | 0.1                                     | 1073                              |
| 6          | 8          | 300                             | 6000                             | 0.15                                    | 2126                              |
| 17         | 9          | 200                             | 9000                             | 0.1                                     | 1203                              |
| 9          | 10         | 100                             | 9000                             | 0.1                                     | 793                               |
| 4          | 11         | 300                             | 12000                            | 0.05                                    | 1180                              |
| 18         | 12         | 200                             | 9000                             | 0.1                                     | 1150                              |
| 13         | 13         | 200                             | 9000                             | 0.05                                    | 1173                              |
| 2          | 14         | 300                             | 6000                             | 0.05                                    | 2254                              |
| 19         | 15         | 200                             | 9000                             | 0.1                                     | 1328                              |
| 14         | 16         | 200                             | 9000                             | 0.15                                    | 1042                              |
| 12         | 17         | 200                             | 12000                            | 0.1                                     | 987                               |
| 15         | 18         | 200                             | 9000                             | 0.1                                     | 1290                              |
| 11         | 19         | 200                             | 6000                             | 0.1                                     | 1640                              |
| 3          | 20         | 100                             | 12000                            | 0.05                                    | 517                               |
